# Supplementary material
Source: MDPI journal article supplement (https://www.mdpi.com/2227-9717/10/2/326)

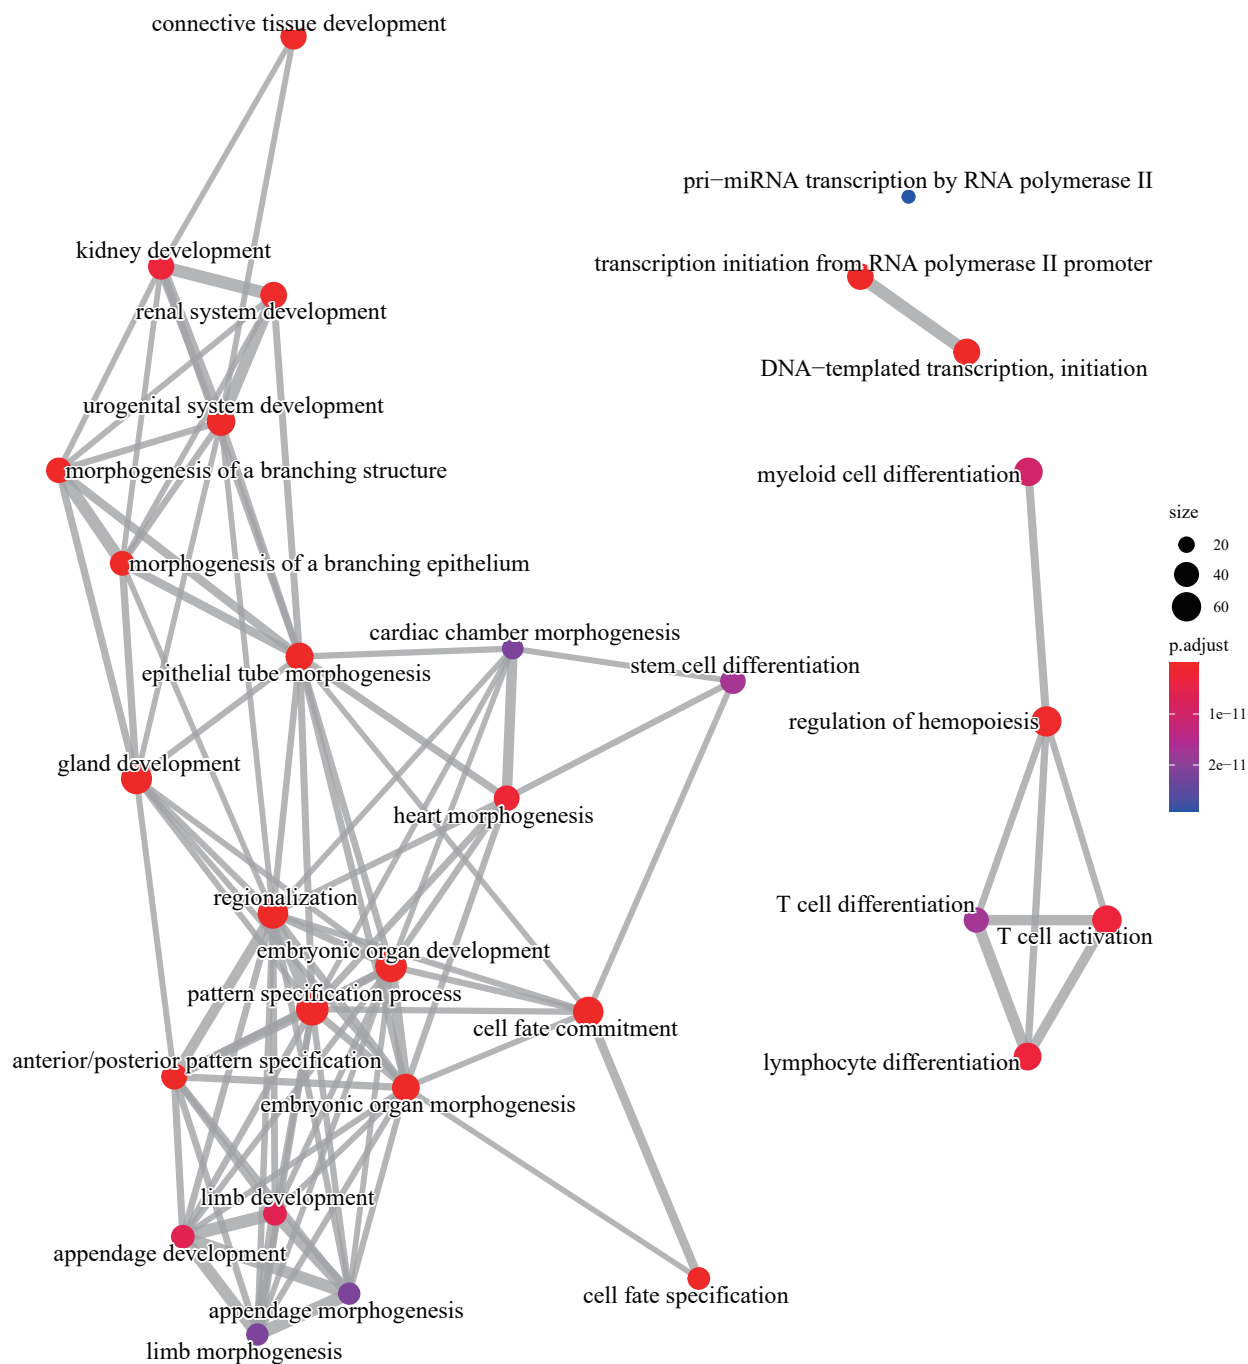

**Supplementary Figure S1** :Gene Ontology enrichment pathways of genes in module 1.

Supplement: s1 [file s1]
